# Supplementary material
Source: PubMed Central journal article supplement (PMC7388153)
Supplement: NIHMS1579543-supplement-supp.pdf [file NIHMS1579543-supplement-supp.pdf]

**Table 1:** Pre vs Post Intervention  
Overall

| Pre vs Post       | Number of Cases | Mean Case Length (min.) (range, SD) | Mean No. Door Openings per case (range, SD) | Mean Rate Door Openings (per min.) (range, SD) |
|-------------------|-----------------|-------------------------------------|---------------------------------------------|------------------------------------------------|
| Pre intervention  | 35              | 219.1 (114-465, 70.6)               | 124.3 (48-220, 42.7)                        | 0.58 (0.22-1.01, 0.16)                         |
| Post intervention | 42              | 206.6 (94-301, 52.3)                | 86.7 (41-131, 22.2)                         | 0.45 (0.26-1.05, 0.17)                         |
| <i>p</i> -value   | -               | <i>0.3779</i>                       | <i>&lt; 0.0000</i>                          | <i>0.0011</i>                                  |

No. = number, Min = minute, SD = standard deviation.

**Table 2:** Pre vs Post Incision

| Pre vs Post       | Number of Cases† | Pre-incision Rate (per min.) (range, SD) | Post-incision Rate (per min.) (range, SD) | <i>p</i> -value |
|-------------------|------------------|------------------------------------------|-------------------------------------------|-----------------|
| Pre intervention  | 24               | 0.76 (0.44-1.10, 0.20)                   | 0.42 (0.11-0.96, 0.20)                    | < 0.0001        |
| Post intervention | 42               | 0.72 (0.37-1.12, 0.19)                   | 0.12 (0.02-0.42, 0.08)                    | < 0.0001        |
| <i>p</i> -value   | -                | 0.4057                                   | < 0.0001                                  | -               |

† only 24/35 cases for pre-intervention had pre/post incision data collected

SD = standard deviation, Min = minute.

**Table 3:** Pre vs Post; by Group†

| Pre vs Post       | Number of Cases | A Mean Rate Door Openings (per min.) (SD) | B Mean Rate Door Openings (per min.) (SD) | C Mean Rate Door Openings (per min.) (SD) | D Mean Rate Door Openings (per min.) (SD) | E Mean Rate Door Openings (per min.) (SD) |
|-------------------|-----------------|-------------------------------------------|-------------------------------------------|-------------------------------------------|-------------------------------------------|-------------------------------------------|
| Pre intervention  | 35              | 0.31 (0.11)                               | 0.06 (0.03)                               | 0.12 (0.05)                               | 0.06 (0.04)                               | 0.03 (0.03)                               |
| Post intervention | 42              | 0.25 (0.10)                               | 0.05 (0.03)                               | 0.08 (0.04)                               | 0.04 (0.03)                               | 0.01 (0.02)                               |
| <i>p</i> - value  | -               | <i>0.0044</i>                             | <i>0.1072</i>                             | <i>0.0022</i>                             | <i>0.0157</i>                             | <i>0.026</i>                              |

†A - nursing and scrub technology team, B - anesthesia team, C - surgical team, D - vendor team, E - radiology technology team.

SD = standard deviation, Min = minute.
